# Supplementary material for: Future interannual variability of Arctic sea ice in coupledclimate models
Source: Copernicus journal article supplement (doi:10.5194/tc-2018-100), 2018-06-01
Supplement: Supplementary file 1 [file tc-2018-100-supplement.pdf]

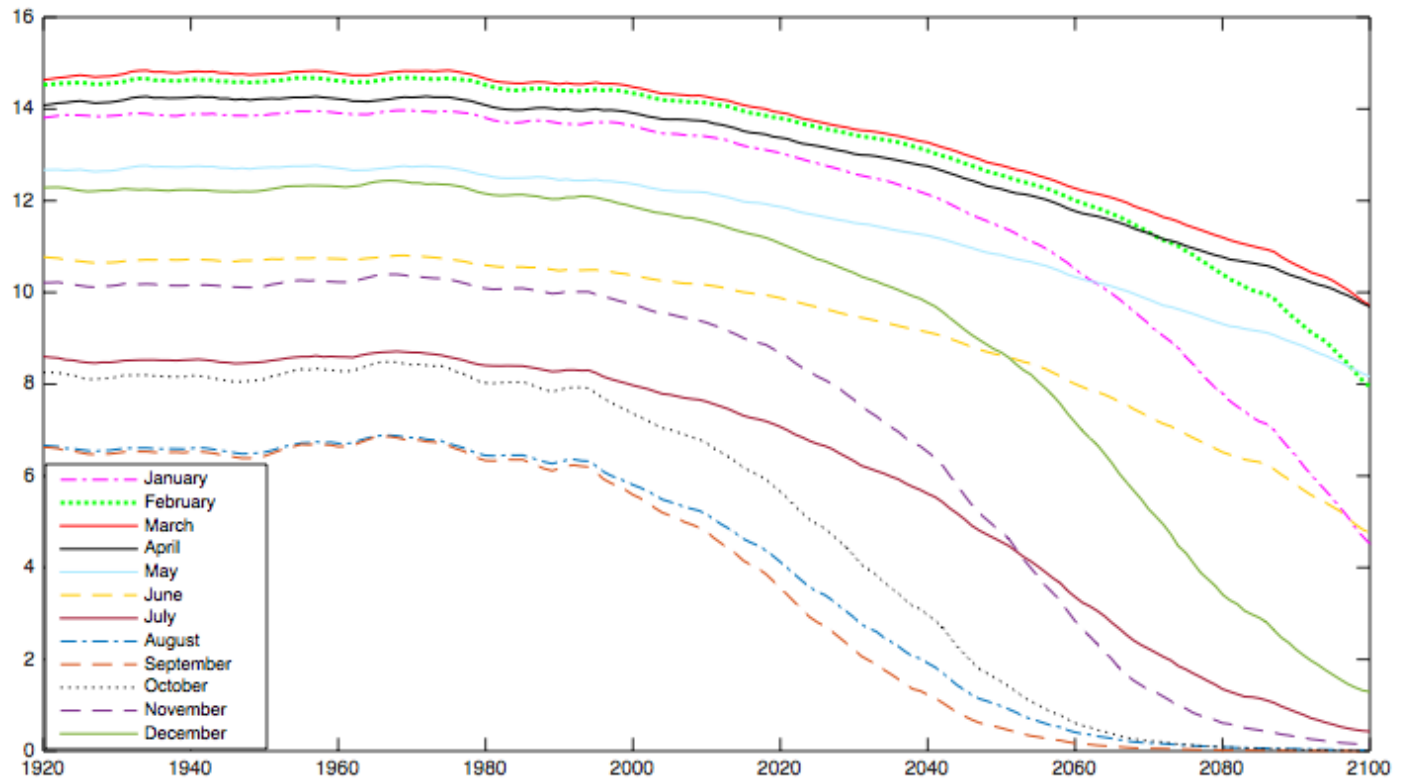

**Figure S1:** The CESM-LE ensemble mean time series of monthly sea ice area ( $\text{km}^2 \times 10^6$ ).

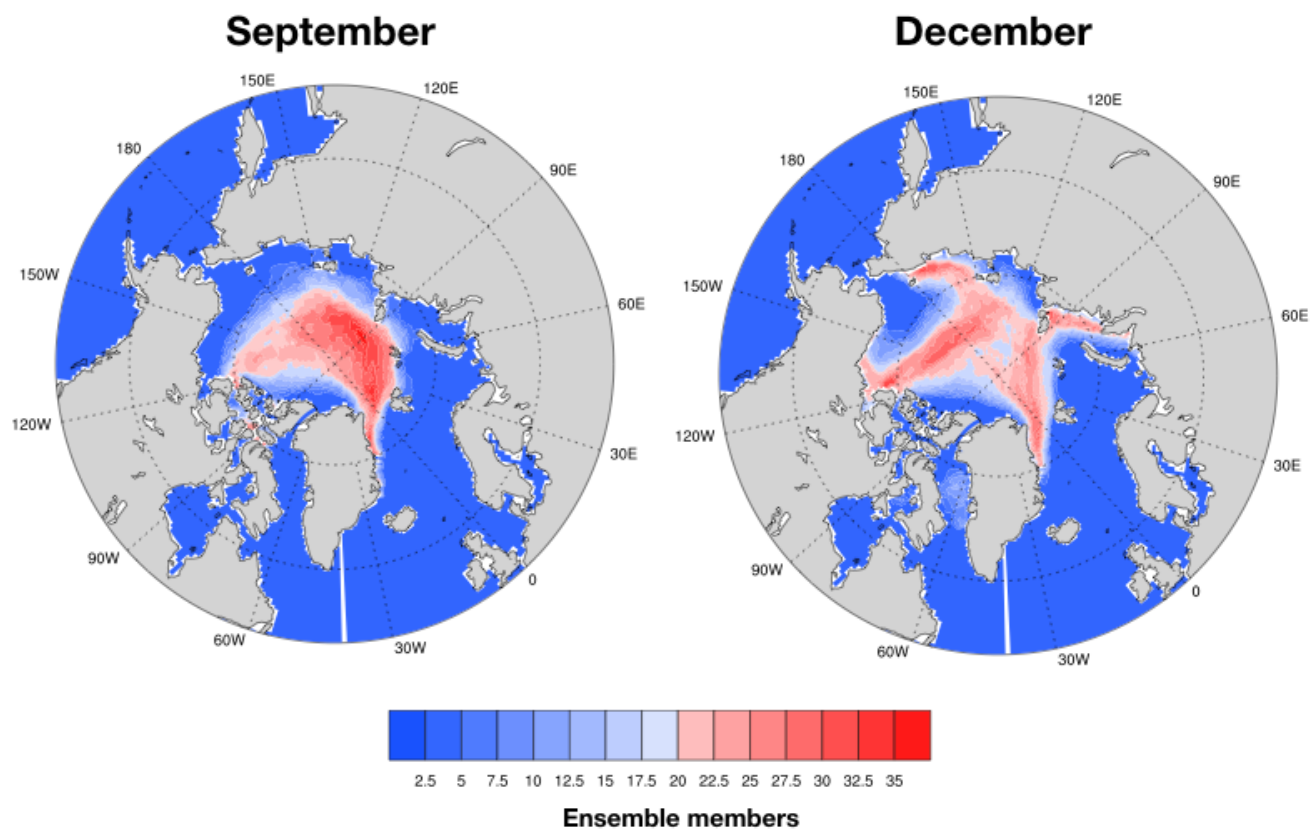

**Figure S2:** Map of the total number of ensemble members where the standard deviation of the 10-year time series of ice area within each grid cell exceeds 30% within a) September and b) December's decade of maximum variability.
